# 1 **Mouse lemurs' use of degraded habitat**

## 2 **Running head: Mouse lemurs use degraded habitat**

3 Simon KNOOP<sup>i,ii\*</sup>, Lounès CHIKHI<sup>i,iii,iv</sup>, Jordi SALMONA<sup>i,iii,iv\*</sup>

4 <sup>i</sup> *Instituto Gulbenkian de Ciencia, Rua da Quinta Grande 6, P-2780-156 Oeiras, Portugal.*

5 <sup>ii</sup> *Geographisches Institut, Universität Heidelberg, Heidelberg, Germany*

6 <sup>iii</sup> *CNRS, Université Paul Sabatier, ENFA, UMR 5174 EDB (Laboratoire Evolution & Diversité Biologique),*

7 *Toulouse, France*

8 <sup>iv</sup> *Université de Toulouse, UMR 5174 EDB, Toulouse, France*

### 9 **\* Corresponding authors:**

10 Simon Knoop: Email: [simon.knoop@gmx.de](mailto:simon.knoop@gmx.de)

11 Jordi Salmons: Email: [jordi.salmons@gmail.com](mailto:jordi.salmons@gmail.com)

12

## 13 RESEARCH HIGHLIGHTS

- 14 • Little differences in the use of degraded forest (DF) between forest types, distribution  
15 ranges or conservation status.
- 16 • Varying factors potentially affecting DF use, such as food resources, forest structure, tree  
17 hole availability and predation.

18

## 19 ABSTRACT

20 Madagascar is known for its unique biodiversity including its endemic primates, the lemurs. This  
21 biodiversity is threatened by deforestation, forest degradation and anthropogenic disturbances.  
22 Several mouse lemurs (genus *Microcebus*) have been shown to cope with habitat disturbances  
23 and degradation. However, there are 24 recognized mouse lemur species living in very different  
24 habitats, and it is not clear whether all these species respond similarly to forest degradation.  
25 Here, we review the literature on mouse lemur use of degraded habitat. We further question  
26 whether mouse lemurs show variation in degraded habitat use, with respect to forest type,  
27 conservation status and distribution range. We show that data on degraded forest (DF) use is  
28 available for 14 species and geographically aggregated in a few locations. However, data are  
29 scarce for most species, and lacking for almost half of the currently recognized species. Our  
30 results however confirm that most mouse lemur species are able to cope with, but do not  
31 necessarily respond positively to habitat degradation. We found no variation in degraded  
32 habitat use, with respect to forest type, conservation status and distribution range. However,  
33 we identified food resources availability, understory structure, predation, and tree hole  
34 availability to be the most frequently invoked factors potentially influencing DF use. The relative

35 frequency of these four factors vary among forest types suggesting that differences may exist  
36 but still require research efforts for ecological and environmental differences among regions to  
37 be fully understood.

38 **Key words:** Madagascar, *Microcebus*, habitat alteration, human impact, degraded forest.

39

## 40 INTRODUCTION

41 Madagascar is considered one of the world's "hottest" biodiversity hotspots due to its  
42 exceptional biodiversity and the high level of threats this diversity faces (Goodman & Benstead,  
43 2005; Myers, Mittermeier, Mittermeier, Da Fonseca, & Kent, 2000). Home to *ca.* 110 currently  
44 recognized lemur taxa (Louis Jr. & Lei, 2016; Mittermeier et al., 2014; Setash, Zohdy, Gerber, &  
45 Karanewsky, 2017), Madagascar harbors the second-highest primate diversity of all countries  
46 and the highest proportion of primate endemism (Mittermeier et al., 2010). Mouse lemur  
47 habitats and population sizes are decreasing, while their level of threat is rising, mainly from  
48 deforestation, forest degradation, and poaching (IUCN, 2017; Schwitzer et al., 2013; Schwitzer,  
49 Mittermeier, et al., 2014). Since 2014, 18 out of 24 recognized mouse lemur species are  
50 considered threatened (IUCN, 2017; Schwitzer et al., 2013). This high proportion of threatened  
51 species is not surprising if we consider the high rate (>50% between the 1950's and 2000) of  
52 forest loss in Madagascar (Schwitzer, Chikhi, et al., 2014). However, they contrast with data  
53 suggesting that some species of mouse lemurs are able to use degraded habitat (Ganzhorn,  
54 1995; Mittermeier et al., 2010). Mouse lemurs are commonly observed in degraded forest (we  
55 use here a large definition including partially logged, partially deforested, partially cultivated,  
56 regenerating forest, but not completely denuded landscape, cf. Methods section for details)  
57 (Herrera, Wright, Lauterbur, Ratovonjanahary, & Taylor, 2011; Miller et al., submitted;  
58 Randrianambinina, Rasoloharijaona, Rakotondravony, Zimmermann, & Radespiel, 2010), rural  
59 areas (Deppe, Randriamiarisoa, Schütte, & Wright, 2007; Ganzhorn, 1987), and in garden  
60 environments (Irwin et al., 2010). Aside these evidences, mouse lemurs are forest-dwelling  
61 species, and depend on forest for survival (Ganzhorn & Schmid, 1998; Karanewsky & Wright,

62 2015). Thus, DF might only harbor sink populations. Understanding the use of DF by mouse  
63 lemurs may therefore be crucial to their conservation (Schwitzer et al., 2013).

64 Dry and humid forest species typically have a different diet (Kappeler & Rasoloarison, 2003;  
65 Radespiel, 2007), and dry forests generally harbor higher population densities than humid  
66 forests (Randrianambinina et al., 2010; Setash et al., 2017). In addition, western dry and eastern  
67 humid regions harbor contrasting climatic conditions and climatic extremes that may have led  
68 to the development of independent unique resource use strategies (Génin, 2008, 2010; Kobbe  
69 & Dausmann, 2009). We therefore ask the following question (Q1): *“Do mouse lemurs vary in  
70 their responses to DF in humid and dry forests?”*

71 Mouse lemur species show a large diversity of distribution range size. Species with large  
72 distribution (e.g. *M. murinus*) show high seasonal variability in feeding behavior and high  
73 colonization ability (Radespiel, 2016). Contrastingly, other species are stuck in small areas for  
74 yet not always clear reasons. We therefore ask the following question (Q2) *“Do mouse lemur  
75 species with different distribution ranges vary in their responses to DF?”*

76 Finally, conservation status is primarily based on population and distribution trends as well as  
77 on threats faced by the species (IUCN, 2012). In other words, it summarizes a large panel of  
78 factors that may be involved in the ability of mouse lemur species to use DF. We therefore  
79 question (Q3) if *“species with different conservation status vary in their responses to DF”*.

80 This paper reviews mouse lemur DF use and investigate the three abovementioned questions  
81 (Q1-3). Finally the present work emphasizes the most commonly invoked and reported factors  
82 potentially affecting DF use.

83

## 84    **METHODS**

85    We searched “JSTOR”, “Science Direct”, “Wiley”, “Springer Link”, and “Google Scholar”  
86    databases as well as all issues of “Lemur News” and “Primate Conservation” for “*Microcebus*”,  
87    “adaptation”, “habitat use” and “habitat degradation”. From identified papers we subsequently  
88    searched for species, sex, forest type (dry, humid) and degradation level (cf. classification  
89    below), type of degraded habitat use reported: positive, neutral and negative responses to DF  
90    and factors invoked (diet, habitat characteristics, sleeping sites, seasonal variation in habitat  
91    use, daily torpor/hibernation, territoriality, home range size, competition/coexistence). All  
92    studies reporting the presence or absence of mouse lemurs in DF and/or assessing mouse lemur  
93    habitat or diet preferences were considered. Review papers reporting information from case  
94    studies were not considered.

95    To compare degradation levels and mouse lemur responses to DF described in different  
96    manners in the considered studies, we categorized them, based on the terminology used by the  
97    authors. The following terms were considered for primary forest: primary, pristine or natural  
98    forest, unexploited forest, undisturbed forest, intact forest, continuous canopy, high density of  
99    large trees, high tree species diversity, and absence of human activities. For DF, we considered  
100    secondary forest, lightly, moderately, severely degraded or disturbed habitat, forest edges,  
101    *savoka* (*i.e.* transitional secondary vegetation after abandonment of agriculture (Radespiel et  
102    al., 2012)), forest harboring human activities such as logging, mining, charcoal production, cattle  
103    grazing, and fire or traces of fire. For cultivated areas, we considered plantations or areas of  
104    slash-and-burn agriculture *i.e.* *tavy*. Open sites, grassland or savanna were categorized as  
105    grassland. A factor putatively influencing DF use was considered when specifically investigated  
106    in a particular study. Studies conducted by the same researchers, on the same species, in the

107 same study area and presenting similar results were pooled in a “study cluster” (cf. Table 2).  
108 Each “study cluster” was treated as one study in the evaluation. Results on more than one  
109 species reported in a single study were considered independently. From now on, all single  
110 studies and study clusters are called “studies” without distinction.

111 The taxonomy of mouse lemurs was subject to regular changes within the last decades (Hotaling  
112 et al., 2016; Lei et al., 2015; Rasoloarison, Weisrock, Yoder, Rakotondravony, & Kappeler, 2013;  
113 Schwitzer et al., 2013; Thiele, Razafimahatratra, & Hapke, 2013). Hence, former species names  
114 were modified to fit the latest taxonomy. Both current and original species names are  
115 mentioned in Table 2.

116 We retrieved the size of each species’ distribution (extent of occurrence, EOO) from the IUCN  
117 red list database (IUCN, 2017). Since there is a large uncertainty in the way EOOs are drawn, we  
118 assigned each EOO to one of three categories to distinguish small and large distribution range  
119 species: “small” (for microendemic species with very few localities or an area of less than 2100  
120 km<sup>2</sup>), “large” (for species with large distributions of more than 8350 km<sup>2</sup>, i.e. *M. murinus*, *M.*  
121 *griseorufus* and *M. myoxinus*), and “medium”. This category comprises the remaining species  
122 that do not fall in any of the other two categories (with distributions between 2100 and 8350  
123 km<sup>2</sup>). This simplification allows little known but restricted species to fall in the “small” category  
124 even though their EOO was sometime originally extrapolated from a single location. Studies  
125 were geographically represented using ArcGIS (ESRI®). To compare mouse lemurs’ use of DF, we  
126 categorized the reported responses and/or use of DF into three categories: “positive effect” of  
127 forest degradation (mentions of preferential use of DF, higher abundance and greater fitness in  
128 DF), “neutral responses” (tolerance to DF, similar abundance at degraded and non-degraded  
129 sites, and foraging on cultivated plant species, or no detected differences), “negative responses”

130 (exclusive use or higher abundance in primary forest, reduced fitness, reduced long-term  
131 population viability in DF, poaching, increased predation by domestic or wild animals in DF, and  
132 increased parasite spillover from humans or domestic animals). Single reports for observations  
133 of mouse lemurs in DF were not considered, since they do not indicate clear quantitative DF use  
134 trend.

135 To test for variation in degraded habitat use, with respect to forest type (dry, humid),  
136 conservation status and distribution range, we used a two sided Fisher's exact independence  
137 test using R (R Core Team, 2015). This research adhered to the American Society of  
138 Primatologists' principles for the ethical treatment of primates.

## 139 **RESULTS**

140 We found a total of 84 studies (see the definition of "studies" in the method section) reporting  
141 effects of forest degradation on mouse lemurs. In 75 studies, the species names were specified  
142 (Tables 1, 2). In the other nine studies, the species name was not specified and could not be  
143 identified based on current taxonomy or geographic data (Table 2). Of these 75 studies, only 24  
144 primarily focused on differential habitat quality use (*i.e.* 32%), but a larger proportion ( $n=65$ , *i.e.*  
145 87%) evaluated responses of mouse lemurs towards DF (Table 2). Of these 65 studies, 27 (42%)  
146 reported negative, 23 (35%) neutral and 15 (23%) positive responses towards DF (Figure 1a,  
147 Tables 1, 2). While at the genus level a larger proportion of studies suggests that DF has a  
148 negative effect, our results also confirm that most of the studied mouse lemur species (12 out  
149 of 14) are able to use DF (Figure 1a, Table 2). However, reports of DF use are scarce for the  
150 majority of mouse lemur species, and unequally distributed across Madagascar. Most studies  
151 are concentrated in a few parks and sites with research facilities and long term research



152 programs, such as Kirindy (9 studies), Ankarafantsika (8) and Ranomafana (13) (Figure 2),  
153 resulting in a paucity of data for numerous species outside of these parks. Hence, seven species  
154 are represented by one or two studies (Figure 1 main graph, Tables 1, 2) and ten species are not  
155 represented (e.g. *M. bongolavensis*, *M. jollyae*).

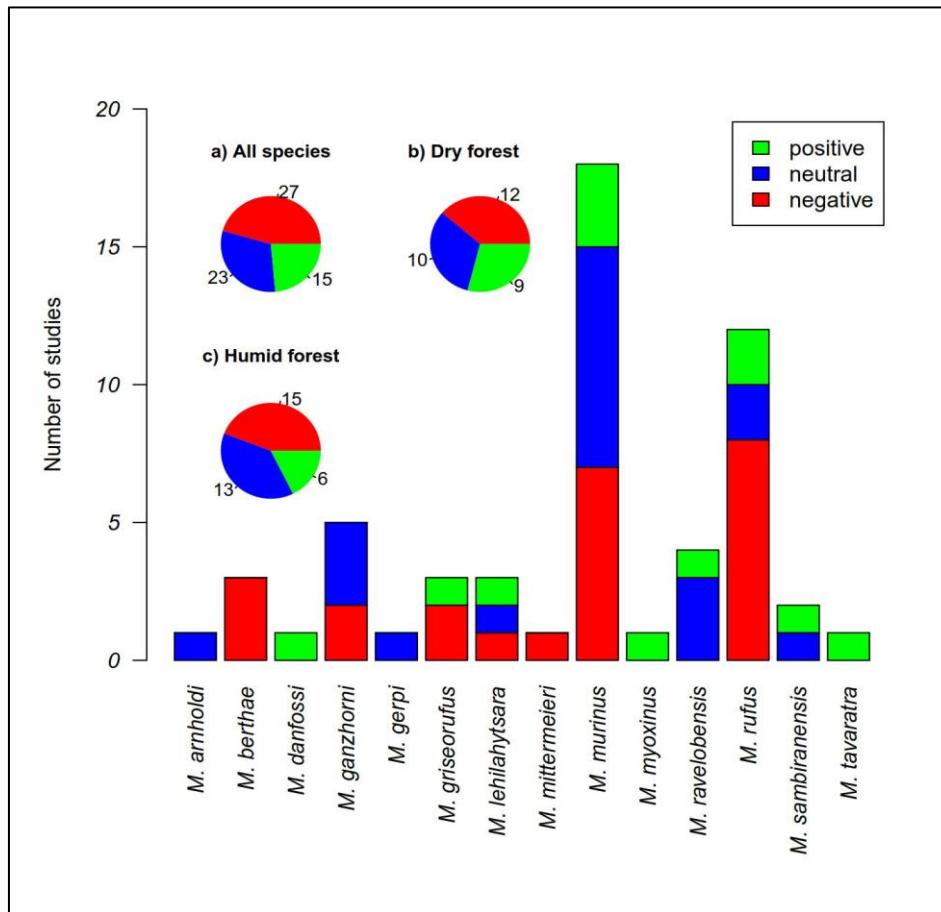

156  
157 **Figure 1: Forest degradation effect on mouse lemurs.**  
158 The main barplot represents the number of studies reporting negative, neutral or positive responses towards DF for  
159 each species. The pie charts represent the proportions (and numbers, beside the pie charts) of negative, neutral or  
160 positive responses obtained for **a) all species**, **b) dry forest species** and **c) humid forest species**.

161

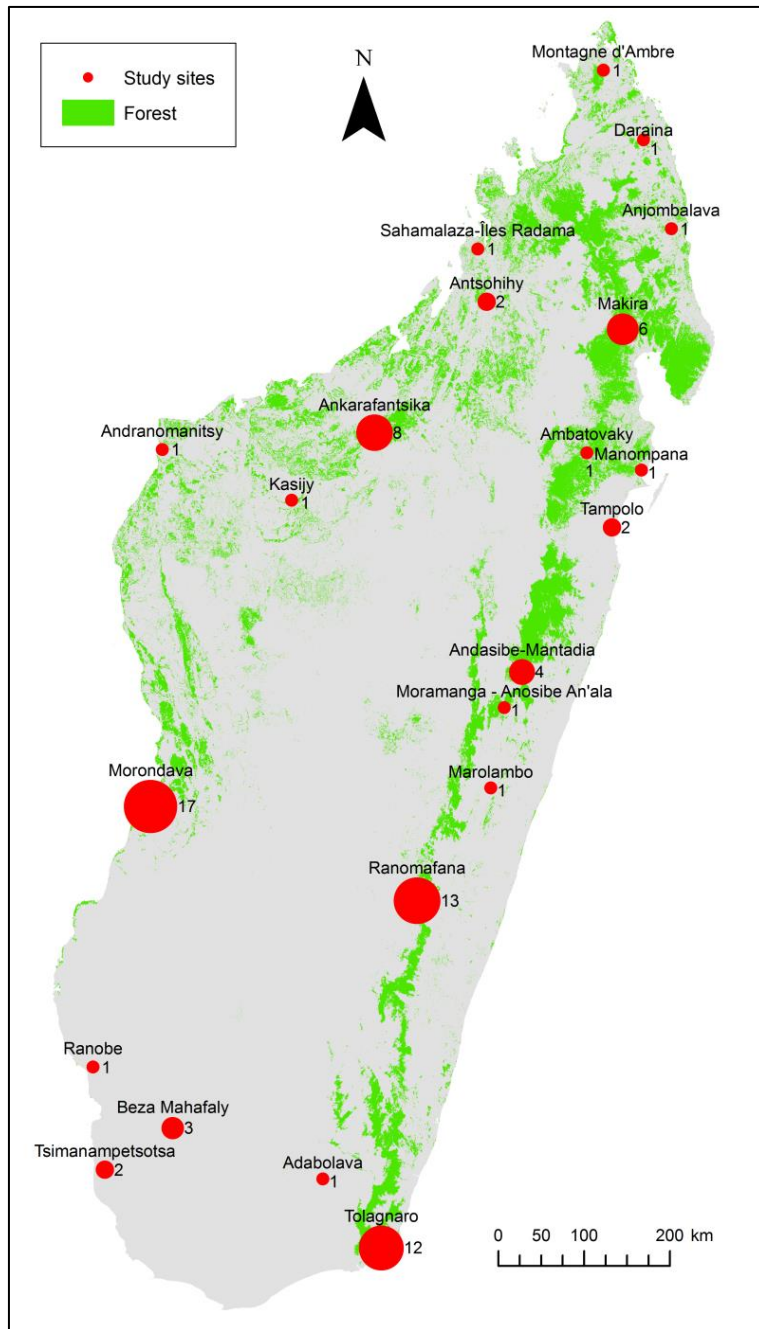

162

163 **Figure 2: Geographic distribution of mouse lemur DF use studies.**

164 The diameter of the red dots are proportional to the number of studies (numbers beside dots) in the respective

165 locations. Forest cover from the Madagascar Vegetation Mapping Project data (available online at

166 [http://www.kew.org/gis/projects/mad\\_veg/datasets.html](http://www.kew.org/gis/projects/mad_veg/datasets.html)); (Moat & Smith, 2007). Note that this figure

167 represents numbers of single studies but the results description refers to “study” numbers as described in the

168 method section.

169 Most species with at least three studies showed variable responses to DF with at least one  
 170 positive effect report (Figure 1 main graph, Tables 1, 2). Similarly, the most frequently studied  
 171 species, *M. murinus*, shows a high proportion of neutral responses (8 out of 18 studies) together  
 172 with more negative than positive reports (7 vs. 3 studies). Likewise, *M. rufus* shows more  
 173 negative than positive effects reports (8 vs. 2 studies). Of all species represented by more than  
 174 two studies, *M. ravelobensis* (n=4) is the only one with no report of negative responses to DF  
 175 (Figure 1 main graph, Table 1). In contrast, *M. berthae* was the only species for which only  
 176 negative effects were reported (n=3, Figure 1 main graph, Table 1).

| Species                 | IUCN | Dist. Range | # Total | Response to DF |           |            | Positive factors                                  | Negative factors                                                                                                                                |
|-------------------------|------|-------------|---------|----------------|-----------|------------|---------------------------------------------------|-------------------------------------------------------------------------------------------------------------------------------------------------|
|                         |      |             |         | # Positive     | # Neutral | # Negative |                                                   |                                                                                                                                                 |
| <i>M. murinus</i>       | LC   | L           | 24      | 18             | 3         | 8          | Diet <sup>a</sup> , Predator release <sup>b</sup> | Diet <sup>c</sup> , Poaching <sup>be</sup> , Predation <sup>c</sup> , Tree holes <sup>cf</sup> , Temp. <sup>cf</sup> , Understory <sup>bc</sup> |
| <i>M. rufus</i>         | VU   | M           | 14      | 12             | 2         | 2          | Diet <sup>hijk</sup> , Understory <sup>l</sup>    | Diet <sup>k</sup> , Parasites <sup>l</sup> , Poaching <sup>lm</sup> , Predation <sup>n</sup> , Tree holes <sup>k</sup> , Temp. <sup>ik</sup>    |
| <i>M. ganzhorni</i>     | ns   | ns          | 7       | 5              | 0         | 3          | ns                                                | Understoryg, Parasitesd                                                                                                                         |
| <i>M. ravelobensis</i>  | EN   | M           | 7       | 4              | 1         | 3          | Diet (I) <sup>o</sup>                             | ns                                                                                                                                              |
| <i>M. griseorufus</i>   | LC   | L           | 8       | 3              | 1         | 0          | 2 Parasites <sup>p</sup>                          | Poaching <sup>q</sup>                                                                                                                           |
| <i>M. berthae</i>       | EN   | S           | 4       | 3              | 0         | 0          | na                                                | Comp. <sup>brs</sup> , Understory <sup>bs</sup>                                                                                                 |
| <i>M. lehilahytsara</i> | VU   | M           | 4       | 3              | 1         | 1          | 1 Diet (F) <sup>t</sup>                           | Diet (F) <sup>u</sup> , Understory <sup>u</sup>                                                                                                 |
| <i>M. sambiranensis</i> | EN   | S           | 2       | 2              | 1         | 1          | 0 ns                                              | ns                                                                                                                                              |
| <i>M. amholdi</i>       | EN   | S           | 1       | 1              | 0         | 1          | 0 ns                                              | ns                                                                                                                                              |
| <i>M. danfossi</i>      | EN   | M           | 1       | 1              | 1         | 0          | 0 ns                                              | ns                                                                                                                                              |
| <i>M. gerpi</i>         | CR   | S           | 1       | 1              | 0         | 1          | 0 ns                                              | ns                                                                                                                                              |
| <i>M. mittermeieri</i>  | EN   | S           | 1       | 1              | 0         | 0          | 1 ns                                              | ns                                                                                                                                              |
| <i>M. myoxinus</i>      | VU   | L           | 1       | 1              | 1         | 0          | 0 Diet (F) <sup>v</sup>                           | ns                                                                                                                                              |
| <i>M. tavaratra</i>     | VU   | S           | 1       | 1              | 1         | 0          | 0 Understory <sup>w</sup>                         | ns                                                                                                                                              |

178 **Table 1: Summary of mouse lemurs' degraded habitat use bibliography.** Number of studies reporting use of  
 179 degraded forest and factors invoked or demonstrated to influence degraded forest use per species.

180 *NOTE:* ns= not specified. IUCN: conservation status: LC= Least Concern, VU= Vulnerable, EN= Endangered,  
 181 CR= Critically Endangered. Dist. Range: L= large, M= medium, S= small. # Total: Number of studies reporting  
 182 DF use, Response to DF= Number of studies assessing responses to DF. # Positive/ Neutral/ Negative=  
 183 Number of studies reporting positive/ neutral/ negative responses. Positive/negative factors: main positive  
 184 or negative factors invoke as influencing DF use. Comp= Competition. Diet= Diet (including insects and

185 insect secretions, fruits, leaves, flowers and buds). Diet (F)= Diet (Fruits). D (I)= Diet (Insects). Predation  
186 (n)= Predation by native carnivores. Temp.= Temperature.  
187 a: Corbin and Schmid, 1995; Smith et al., 1997. b: Schäffler, 2011; Schäffler et al., 2015. c: Ganzhorn and  
188 Schmid, 1998. d: Raharivololona, 2009; Raharivololona and Ganzhorn, 2009. e: Gardner and Davies, 2014. f:  
189 Schmid, 1998. g: Andriamandimbarisoa et al., 2015; Rakotondravony and Radespiel, 2009. h: Atsalis, 1999,  
190 i: Lehman, 2006; Lehman et al., 2006a; b; Rajaonson et al., 2010. j: Herrera et al., 2011. k: Wright et al.,  
191 2005; Karanewsky and Wright, 2015. l: Rasambainarivo et al., 2013; Bublitz et al., 2014; Zohdy et al., 2015.  
192 m: Ravoahangy et al., 2008; Lehman & Ratsimbazafy, 2001. n: Ratsirarson and Ranaivonasy, 2002;  
193 Goodman, 2003. o: Burke and Lehman, 2014. p: Rodriguez et al., 2015. q: Dammhahn and Kappeler, 2008a;  
194 b; 2009; 2010. r: Schwab and Ganzhorn, 2004. s: Ganzhorn, 1988. t: Ganzhorn, 1987. u: Ganzhorn, 1995. v:  
195 Meyler et al., 2012.

#### 196 ***Forest type***

197 From the 65 studies evaluating responses towards DF, 31 were conducted in dry and 34 in  
198 humid forest (Figures 1b, c, Table 2). We found no difference in response to DF between dry and  
199 humid forests (Fisher's exact test,  $p= 0.63$ ). However, several reported or invoked factors  
200 potentially influencing response to DF showed contrasting frequency amongst forest types  
201 (Figure 3a). For instance, increased food availability was the most frequently mentioned reason  
202 for the use of DF ( $n=16$ ) in both dry ( $n=8$ ) and humid ( $n=8$ ) forests, but the positive effects were  
203 associated to different causes. In dry forests, high insect abundance in degraded sites was  
204 invoked ( $n=6$ ), whereas high fruit abundance in DF was invoked in humid forests ( $n=6$ ); (Figure  
205 3a).

#### 206 ***Distribution range size***

207 Of the 14 species represented in the literature, six have a small, four a medium-sized, three a  
208 large, and one an undescribed distribution range (Tables 1, 2). We found a strong

209 overrepresentation of species with large ( $n=22$ ), and medium-sized ( $n=20$ ) ranges and only a  
 210 few studies ( $n=9$ ) focusing on species with small distribution ranges (Figure 4a). In addition, we  
 211 found no difference in responses to forest degradation amongst distribution range classes  
 212 Fisher's exact test,  $p=0.99$ , Figure 4a).

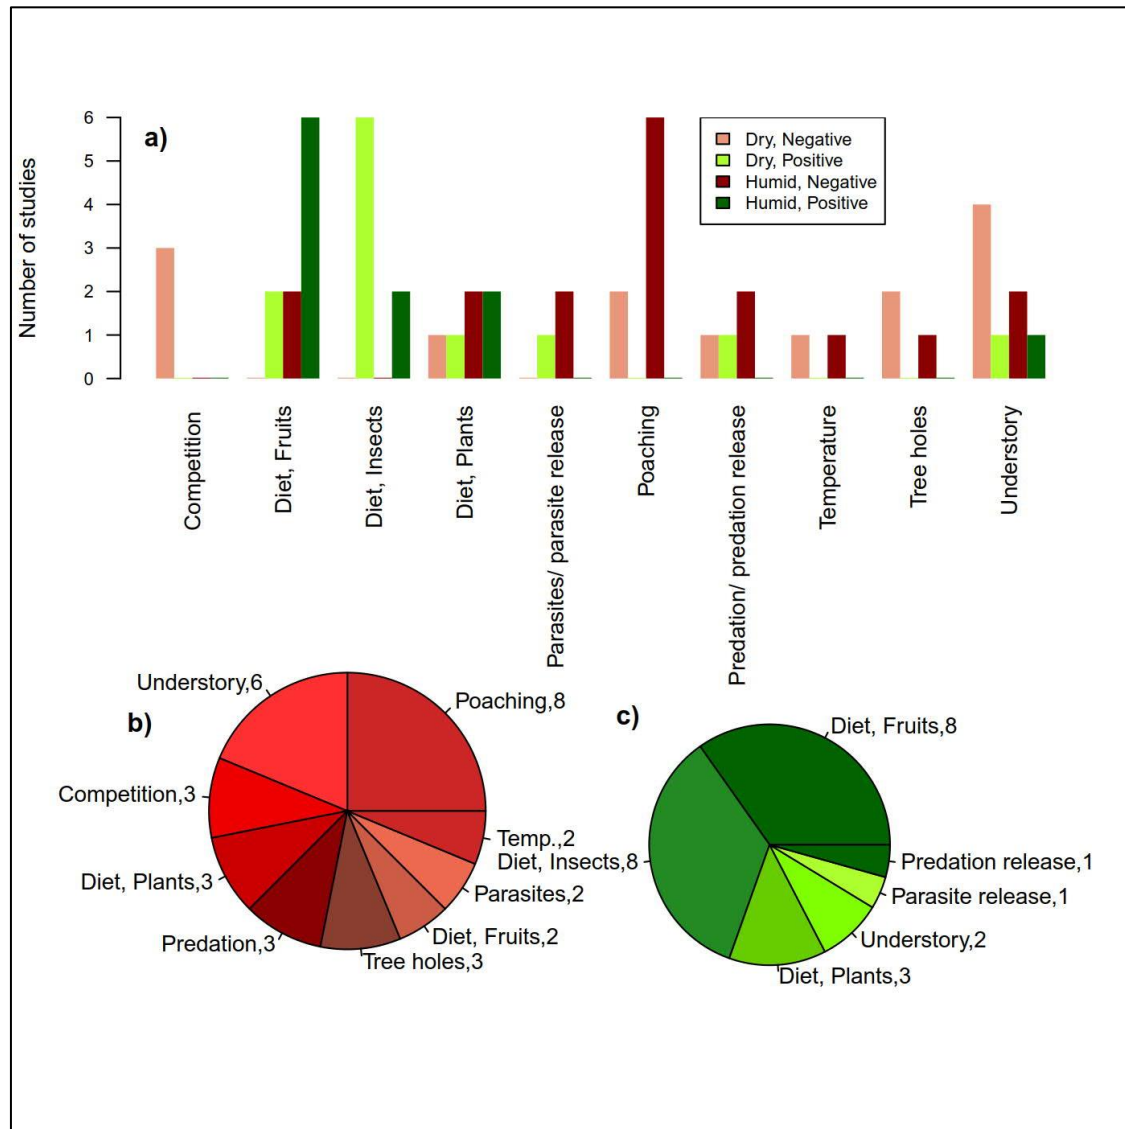

213  
 214 **Figure 3: Reported or invoked causes of mouse lemur DF use.**  
 215 **a):** Numbers of studies suggesting positive or negative effects of factors on DF use in dry and humid forests, **b):**  
 216 negative and **c):** positive effects reported to potentially influence mouse lemur use of DF. Pie sizes are proportional  
 217 to the number of study.

218 **Conservation status**

219 The number of studies per species decreases with increasing conservation status (Figure 4b).  
220 Although 18 out of 24 lemur species are threatened (*i.e.* categorized as “Vulnerable”,  
221 “Endangered” or “Critically Endangered”) (IUCN, 2017; Schwitzer et al., 2013), there are almost  
222 as many studies on “Least Concern” species (n=32, most of them dealing with *M. murinus*) as on  
223 threatened species (n=37). Only one study focused on a Critically Endangered species, *M. gerpi*  
224 (Radespiel et al., 2012) (Figure 1 main graph, Figure 4b, Tables 1, 2). We found no significant  
225 difference in degraded habitat use between conservation status (Fisher’s exact test,  $p= 0.58$ ),  
226 (Figure 4b). This may be due to the bias towards species with lower conservation status.  
227 Almeida-Rocha, Peres, & Oliveira (2017) found a similar pattern in a general pantropical meta-  
228 analysis of primates’ responses to DF.

229

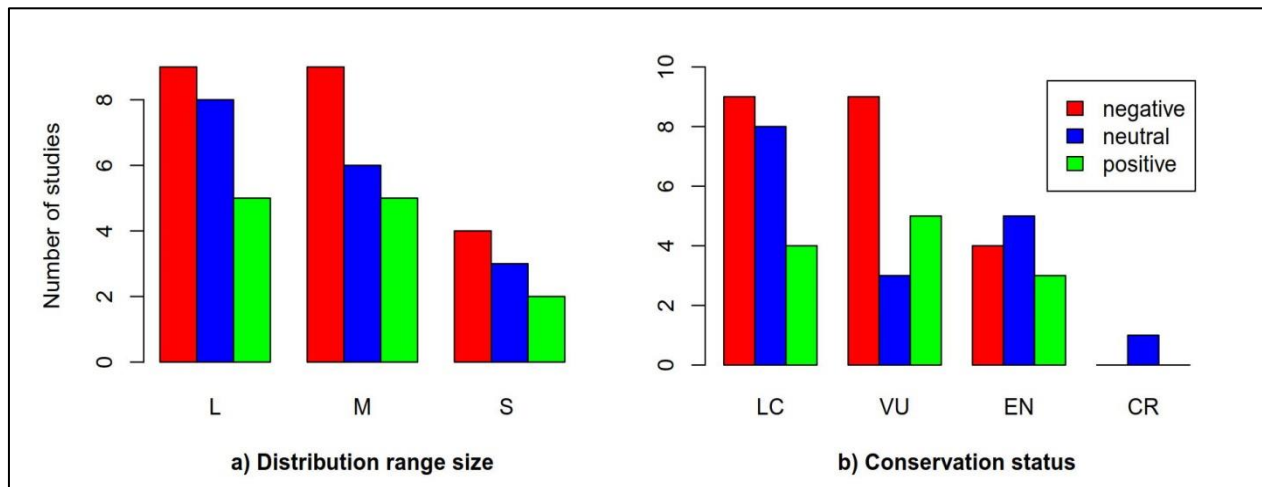

230

231 **Figure 4: Relation between species distribution range size, conservation status and DF use.**

232 Number of studies reporting negative, neutral or positive effect of habitat degradation on mouse lemur use of DF  
233 are represented as function of their **a)** distribution range size (L: large, M: medium, S: small) and **b)** conservation  
234 status (LC: Least Concern, VU: Vulnerable, EN: Endangered, CR: Critically Endangered).

235 ***Factors potentially affecting the use of degraded forest habitats***

236 Most of the 36 studies that invoke or investigate putative causes of DF use report food  
237 resources availability (44.4%; n= 16) and forest structure (30.6%; n= 11) as influencing mouse  
238 lemurs' DF use. Poaching (22.2%; n= 8), predation (11.1%; n= 4), tree hole availability and  
239 pathogen transmission (8.3% each; n= 3) were also reported to potentially affect mouse lemur  
240 use of DF (Figures 3b, c, Table 1).

241

242 **DISCUSSION**

243 Our literature analysis confirms that most mouse lemur species (12 out of 14) are able to use  
244 DF, even though they do not necessarily benefit from forest degradation. However, only 14 out  
245 of 24 species are represented in the literature and data on DF use is scarce for the majority of  
246 the represented species. In addition, it appears that most studies are concentrated in a few  
247 parks and sites with research facilities hosting long term research programs, as well as focused  
248 on a few overrepresented species (*M. murinus* and *M. rufus*). This unbalanced species  
249 representation and the overall low number of studies limited the power of our statistical  
250 inferences. However, it also highlights the lack of data for the most endangered (micro-  
251 endemic) species and stresses the need for a systematic and comprehensive investigation of  
252 species taxonomy, distribution, abundance and diet to accurately study mouse lemur use of DF  
253 (Lehman, Radespiel, & Zimmermann, 2016).

254 Despite dry and humid forest being substantially different and hosting mouse lemurs with  
255 distinct ecology (Kappeler & Rasoloarison, 2003; Radespiel, 2007) we found no clear variation of  
256 DF use between dry and humid forests (Q1). Nevertheless, the factors potentially influencing

257 the use of DF varied (not statistically tested) between dry and humid forest. Food resources  
258 availability was reported or invoked by most studies investigating putative factors explaining the  
259 use of DF. However, while high insect abundance was positively associated with dry DF use, high  
260 fruit abundance was frequently reported from humid DF. This suggests that a systematic  
261 comprehensive investigation of diet in DF and non-DF is required to shed light on the  
262 differences between forests types as also suggested for the Cheirogaleidae family in general  
263 (Lehman et al., 2016).

264 Distribution range and conservation status (Q2 and Q3) are variables expected to be connected  
265 to habitat use flexibility. However, our analyses of the literature showed no evidence of relation  
266 between distribution range, conservation status and DF use. However, it should be kept in mind  
267 that most mouse lemur species have been described in the last decades (Hotaling et al., 2016;  
268 Radespiel et al., 2012; Rasoloarison et al., 2013) and both their taxonomy and distribution range  
269 are not yet fully and definitively characterized (Hotaling et al., 2016; IUCN, 2017; Lehman et al.,  
270 2016; Louis Jr. & Lei, 2016; Schwitzer et al., 2013). Therefore, relationship patterns between  
271 these variables and the use of DF might emerge in the near future from the completion of these  
272 data-sets. The conservation status is a complex and frequently evolving variable influenced not  
273 only by the distribution range and its variation but also by the species demographic trends and  
274 by the development of threats (IUCN, 2012). Hence, it is not necessarily surprising that we could  
275 not find a clear relation between DF use and the conservation status. In addition, our review  
276 highlights that food resources availability and habitat structure (e.g. understory) are the main  
277 factors invoked and/or reported to influence DF use. Below, we further discuss major putative



278 factors in greater detail and finally propose a systematic and comprehensive framework to  
279 investigate DF use patterns.

### 280 ***Food resources availability***

281 Food resources availability was the most frequently invoked factor to explain differential use of  
282 DF (Figure 3) and is seen by many authors as a decisive factor determining the survival  
283 (Ganzhorn & Schmid, 1998; Hladik, Charles-Dominique, & Petter, 1980), the abundance (Bohr,  
284 Giertz, Ratovonamana, & Ganzhorn, 2011; Ganzhorn, 1988; Lehman, Rajaonson, & Day, 2006a;  
285 Sehen et al., 2010), and the reproductive success (Wright, Razafindratsita, Pochron, & Jernvall,  
286 2005) of mouse lemurs. Although mouse lemurs are omnivorous (Mittermeier et al., 2010), their  
287 diet varies amongst species and seasons (Dammhahn & Kappeler, 2008, 2009; Radespiel,  
288 Reimann, Rahelinirina, & Zimmermann, 2006; Rakotondranary, Struck, Knoblauch, & Ganzhorn,  
289 2011; Thorén et al., 2011). A large number of studies (n=16) invoked or reported higher  
290 abundance of particular food resources in degraded forests (Figure 3, Table 1). One of the most  
291 frequently invoked or reported positive effect of forest degradation is the abundance of insects  
292 in DF and along forest edges (Figure 3, Table 1), which constitute a considerable share of several  
293 mouse lemurs species' diet (Corbin & Schmid, 1995; Lehman et al., 2006a). Finally, mouse  
294 lemurs have been reported to feed on cultivated plant species (Deppe et al., 2007; Ganzhorn,  
295 Goodman, & Dehgan, 2003), further emphasizing the role of mouse lemur diet flexibility for its  
296 use of modified habitat. However, negative effects were suggested, often by the same authors.  
297 For instance, Wright et al. (2005) pointed out that a large number of tree species selectively  
298 logged for wood are important components of *M. rufus*' diet.

299

300 ***Understory structure and tree hole availability***

301 Mouse lemurs are mostly found in the shrub and understory layer of the forest (Hladik et al.,  
302 1980; Kappeler & Rasoloarison, 2003). A dense understory seems to constitute the ideal  
303 substrate for feeding (Andriamandimbarisoa et al., 2015; Radespiel et al., 2006), sleeping  
304 (Rasoazanabary, 2004), movements and locomotion (Andriamandimbarisoa et al., 2015;  
305 Ganzhorn, 1987). Although anthropogenic disturbances may have a negative effect on  
306 understory structure, several authors reported positive selective logging and degradation  
307 effects on understory plant production and density (Ganzhorn, 1995, 1999; Herrera et al., 2011).  
308 For instance, Miller et al. (forthcoming) found higher population densities in the dense  
309 understory of mature secondary forest. Similarly, Ganzhorn (1987) reported the presence of  
310 mouse lemurs in old (but not young) *Eucalyptus* plantations with a developed shrub layer.

311 Tree holes constitute ideal shelters for daily torpor, sleeping, communal breeding and against  
312 predation for hollow dwelling species (Ganzhorn & Schmid, 1998; Karanewsky & Wright, 2015;  
313 Radespiel, Zimmermann, & Jurić, 2009). Selectively logged or degraded forests may provide less  
314 suitable tree hole shelters (Figure 3), a potentially limiting resource for hollow dwelling mouse  
315 lemurs' DF use, in times of resource scarcity and climatic extremes (Ganzhorn & Schmid, 1998;  
316 Karanewsky & Wright, 2015; Kobbe & Dausmann, 2009; Schmid, 1998).

317 ***Predation and poaching***

318 Poaching pressure is often associated with DF and forest edges (Lehman, Rajaonson, & Day,  
319 2006b; Lehman & Wright, 2000). Eight studies negatively associated mouse lemur poaching with  
320 differential use of DF (Figure 3, Table 1). Although mouse lemurs suffer lower hunting pressure  
321 than larger-bodied lemur species (Jenkins et al., 2011; Lehman & Ratsimbazafy, 2001), they are

322 consumed by humans (Gardner & Davies, 2014; Jenkins et al., 2011). In addition, domestic  
323 carnivores (*Canis familiaris*) (Gerber, Karpanty, & Randrianantenaina, 2012; Goodman, 2003)  
324 and *Felis catus* (Gerber et al., 2012; Ratsirarson & Ranaivonasy, 2002) are likely to forage more  
325 frequently along forest edges (Figure 3, Table 1) and in forests used by humans (Farris, Gerber,  
326 et al., 2015; Farris, Golden, et al., 2015). Contrastingly, mouse lemurs may reduce predation  
327 rates from wild predators (carnivores, snakes) (Goodman, 2003; Ratsirarson & Ranaivonasy,  
328 2002), birds of prey (Goodman, 2003; Mittermeier et al., 2010) by foraging in dense understory  
329 vegetation and by resting in tree holes (Rasoazanabary, 2004; Schmid, 1998). Indeed, higher  
330 predation pressure in DF was used to explain low DF use in three studies (Figure 3, Table 1).  
331 Contrastingly, Schäffler et al. (2015) suggested a positive effect of predation on DF use  
332 (decreased predation of *M. murinus* by *Mirza spp.*), which in turn released *M. berthae* from  
333 competition in primary forest.

### 334 **Conservation Implications**

335 We highlight five factors frequently reported or invoked as influencing DF use: (i) food resources  
336 availability, (ii) understory and forest structure, (iii) poaching and predation, (iv) tree hole  
337 availability and (v) pathogen transmission. Besides the work required to limit or stop  
338 deforestation, forest degradation and poaching, namely the most important threats to lemur  
339 populations (IUCN, 2017; Schwitzer et al., 2013; Schwitzer, Mittermeier, et al., 2014),  
340 conservation managers may need to consider these five factors (also highlighted in Lehman et  
341 al. (2016)). For instance, reforestation projects may want to consider plant species belonging to  
342 the diet of mouse lemurs (and other species) such as *Bakerella spp.* (Atsalis, 1999), fruit trees  
343 (Atsalis, 1999; Ganzhorn, 1988), trees favoring high insect abundance, as well as hollow-forming

344 trees (e.g. *Strychnos madagascariensis* (Salmona et al., 2015), and fast growing shrubs to  
345 facilitate dispersal and provide shelter for mouse lemurs (Andriamandimbarisoa et al., 2015).  
346 Furthermore, conservation projects considering practices beneficial to rural communities and  
347 wild populations may carefully weigh the effect of selective logging and poaching. Conservation  
348 projects including localized selective logging (e.g. “KoloAla Manompana” (Rakotomavo, 2009))  
349 may not be detrimental to mouse lemur populations (Atsalis, 1999; Ganzhorn, 1995), if middle  
350 sized trees, the understory and the shrub layer are maintained. In addition, although several  
351 studies reported mouse lemurs’ poaching (Gardner & Davies, 2014; Jenkins et al., 2011) and its  
352 negative effects on DF use (Figure 3, Table 1), it seems not be as frequent as for larger-bodied  
353 lemur species (Jenkins et al., 2011; Lehman & Ratsimbazafy, 2001). Mouse lemur populations  
354 are likely to be less susceptible to poaching than larger-bodied lemurs because of their shorter  
355 generation time and higher reproductive rate (Hohenbrink, Zimmermann, & Radespiel, 2015;  
356 Zimmermann & Radespiel, 2013). Therefore, mouse lemur harvesting needs to be formally  
357 evaluated to determine under which conditions sustainability can be achieved (Gardner &  
358 Davies, 2014; Golden, 2009).

359

## 360 **CONCLUSION**

361 Our literature review analysis highlights that although most mouse lemur species are able to use  
362 DF, they are not necessarily favored by DF. Furthermore, it sheds light on the fact that data on  
363 DF use is geographically aggregated in a few locations (Figure 2), lacking for half of the described  
364 species and scarce for the majority of others. This stresses the need for a systematic and  
365 comprehensive investigation that will allow to accurately quantify the use of DF across species

366 and regions. Field efforts should aim at comparing multiple species, and focus on filling the  
367 existing data gap for most micro-endemic species. They should combine density estimates  
368 methods such as nocturnal distance sampling and capture mark recapture (e.g. (Meyler et al.,  
369 2012)), with habitat characterization and opportunistic fecal material collection. In particular,  
370 habitat characterization may focus on describing forest structure (Lehman, 2016) , flora and  
371 fauna diversity, but also on predator abundance using camera traps (e.g. (Farris, Gerber, et al.,  
372 2015; Farris, Golden, et al., 2015)) and tree hole availability. In addition, opportunistic fecal  
373 material sampling from capture studies combined with emergent meta-barcoding approaches  
374 will bring a better understanding of diet and parasite load (De Barba et al., 2014; Quéméré et  
375 al., 2013) in complement to arduous field observations. Finally, combined continuous field and  
376 genetic efforts (Hotaling et al., 2016; Louis Jr. & Lei, 2016; Yoder et al., 2016) will likely bring  
377 soon an accurate representation of species distribution and taxonomy necessary to study such  
378 ecological patterns at the genus scale. While our work focused on mouse lemurs, the second  
379 most speciose lemur genus, we stress that DF use should be studied across vertebrate species.  
380 In fact, similar studies will be required across all animals, plants and fungi as most habitats are  
381 likely to become increasingly fragmented and degraded in the future.

382

### 383 **ACKNOWLEDGEMENTS AND FUNDING INFORMATION**

384 We thank Ute Radespiel, Isa A. Pais and Gabriele Sgarlata for comments and discussion on early  
385 versions of the manuscript as well as a large number of anonymous reviewers that helped  
386 substantially improving the manuscript. Financial support for this study was provided by the  
387 'Fundação para a Ciência e a Tecnologia' (grant number SFRH/BD/64875/2009 to J.S. and grant

388 numbers Biodiversa/0003/2015, PTDC/BIA-BIC/4476/2012, PTDC/BIA-BEC/100176/2008 to L.C.),  
389 the GDRI Madagascar, the ‘Laboratoire d’Excellence’ (LABEX) entitled TULIP (ANR-10-LABX-41),  
390 ‘Rufford Small Grant Foundation’ (grant number 10941-1 to J.S.), the Instituto Gulbenkian de  
391 Ciência, the LIA BEEG-B (Laboratoire International Associé - Bioinformatics, Ecology, Evolution,  
392 Genomics and Behaviour) (CNRS). This study was conducted in agreement with the laws of the  
393 countries of Portugal, France and Madagascar.

394

395

## 396 REFERENCES

397 Almeida-Rocha, J. M. de, Peres, C. A., & Oliveira, L. C. (2017). Primate responses to anthropogenic habitat  
398 disturbance: A pantropical meta-analysis. *Biological Conservation*, 215, 30–38.

399 <https://doi.org/10.1016/j.biocon.2017.08.018>

400 Andriamandimbarisoa, L., Blanthorn, T. S., Ernest, R., Ramanamanjato, J.-B., Randriatafika, F., Ganzhorn,  
401 J. U., & Donati, G. (2015). Habitat corridor utilization by the gray mouse lemur, *Microcebus*  
402 *murinus*, in the littoral forest fragments of southeastern Madagascar. *Madagascar Conservation*  
403 *& Development*, 10(3), 144–150.

404 Atsalis, S. (1999). Diet of the brown mouse lemur (*Microcebus rufus*) in Ranomafana National Park,  
405 Madagascar. *International Journal of Primatology*, 20(2), 193–229.

406 Bohr, Y. E.-M. B., Giertz, P., Ratovonamana, Y. R., & Ganzhorn, J. U. (2011). Gray-brown mouse lemurs  
407 (*Microcebus griseorufus*) as an example of distributional constraints through increasing  
408 desertification. *International Journal of Primatology*, 32(4), 901–913.

409 <https://doi.org/10.1007/s10764-011-9509-8>

- 410 Corbin, G. D., & Schmid, J. (1995). Insect secretions determine habitat use patterns by a female lesser  
411 mouse lemur (*Microcebus murinus*). *American Journal of Primatology*, 37(4), 317–324.
- 412 Dammhahn, M., & Kappeler, P. M. (2008). Comparative feeding ecology of sympatric *Microcebus berthae*  
413 and *M. murinus*. *International Journal of Primatology*, 29(6), 1567–1589.
- 414 Dammhahn, M., & Kappeler, P. M. (2009). Females go where the food is: Does the socio-ecological  
415 model explain variation in social organisation of solitary foragers? *Behavioral Ecology and*  
416 *Sociobiology*, 63(6), 939–952. <https://doi.org/10.1007/s00265-009-0737-2>
- 417 De Barba, M., Miquel, C., Boyer, F., Mercier, C., Rioux, D., Coissac, E., & Taberlet, P. (2014). DNA  
418 metabarcoding multiplexing and validation of data accuracy for diet assessment: Application to  
419 omnivorous diet. *Molecular Ecology Resources*, 14(2), 306–323. [https://doi.org/10.1111/1755-](https://doi.org/10.1111/1755-0998.12188)  
420 [0998.12188](https://doi.org/10.1111/1755-0998.12188)
- 421 Deppe, A. M., Randriamiarisoa, M., Schütte, K., & Wright, P. C. (2007). A brief lemur survey of the  
422 Ranomafana Andringitra corridor region in Tolongoina, southeast Madagascar. *Lemur News*,  
423 12(12), 43–46.
- 424 Esri Inc. (2014). ArcGIS (Version 10.2.2.3552) [Desktop].
- 425 Farris, Z. J., Gerber, B. D., Karpanty, S., Murphy, A., Andrianjakarivelo, V., Ratelolahy, F., & Kelly, M. J.  
426 (2015). When carnivores roam: Temporal patterns and overlap among Madagascar’s native and  
427 exotic carnivores: Activity patterns of Madagascar’s carnivore community. *Journal of Zoology*,  
428 296(1), 45–57. <https://doi.org/10.1111/jzo.12216>
- 429 Farris, Z. J., Golden, C. D., Karpanty, S., Murphy, A., Stauffer, D., & Ratelolahy, F. (2015). Hunting, exotic  
430 carnivores, and habitat loss: Anthropogenic effects on a native carnivore community,  
431 Madagascar. *PLoS ONE*, 10, e0136456(9). <https://doi.org/10.1371/journal.pone.0136456>
- 432 Ganzhorn, J. U. (1987). A possible role of plantations for primate conservation in Madagascar. *American*  
433 *Journal of Primatology*, 12(2), 205–215.
- 434 Ganzhorn, J. U. (1988). Food partitioning among Malagasy primates. *Oecologia*, 75(3), 436–450.

- 435 Ganzhorn, J. U. (1995). Low-level forest disturbance effects on primary production, leaf chemistry, and  
436 lemur populations. *Ecology*, 76(7), 2084–2096. <https://doi.org/10.2307/1941683>
- 437 Ganzhorn, J. U. (1999). Lemurs as indicators for assessing biodiversity in forest ecosystems of  
438 Madagascar: Why it does not work. In A. Kratochwil (Ed.), *Biodiversity in ecosystems: principles*  
439 *and case studies of different complexity levels*. (pp. 163–174). Dordrecht, the Netherlands:  
440 Kluwer Academic Publishers.
- 441 Ganzhorn, J. U., Goodman, S. M., & Dehgan, A. (2003). Effects of forest fragmentation on small mammals  
442 and lemurs. In S. M. Goodman & J. P. Benstead (Eds.), *The natural history of Madagascar* (pp.  
443 1228–1234). Chicago, USA: University of Chicago Press.
- 444 Ganzhorn, J. U., & Schmid, J. (1998). Different population dynamics of *Microcebus murinus* in primary  
445 and secondary deciduous dry forests of Madagascar. *International Journal of Primatology*, 19(5),  
446 785–796.
- 447 Gardner, C. J., & Davies, Z. G. (2014). Rural bushmeat consumption within multiple-use protected areas:  
448 Qualitative evidence from southwest Madagascar. *Human Ecology*, 42(1), 21–34.  
449 <https://doi.org/10.1007/s10745-013-9629-1>
- 450 Génin, F. (2008). Life in unpredictable environments: First investigation of the natural history of  
451 *Microcebus griseorufus*. *International Journal of Primatology*, 29(2), 303–321.  
452 <https://doi.org/10.1007/s10764-008-9243-z>
- 453 Génin, F. (2010). Who sleeps with whom? Sleeping association and socio-territoriality in *Microcebus*  
454 *griseorufus*. *Journal of Mammalogy*, 91(4), 942–951. [https://doi.org/10.1644/09-MAMM-A-](https://doi.org/10.1644/09-MAMM-A-239.1)  
455 239.1
- 456 Gerber, B. D., Karpanty, S. M., & Randrianantenaina, J. (2012). The impact of forest logging and  
457 fragmentation on carnivore species composition, density and occupancy in Madagascar's  
458 rainforests. *Oryx*, 46(03), 414–422. <https://doi.org/10.1017/S0030605311001116>



- 459 Golden, C. D. (2009). Bushmeat hunting and use in the Makira Forest, north-eastern Madagascar: A  
460 conservation and livelihoods issue. *Oryx*, 43(03), 386–392.
- 461 Goodman, S. M. (2003). Predation on lemurs. In S. M. Goodman & J. P. Benstead (Eds.), *The natural*  
462 *history of Madagascar* (pp. 1228–1234). Chicago, USA: University of Chicago Press.
- 463 Goodman, S. M., & Benstead, J. P. (2005). Updated estimates of biotic diversity and endemism for  
464 Madagascar. *Oryx*, 39(01), 73–77. <https://doi.org/10.1017/S0030605305000128>
- 465 Herrera, J. P., Wright, P. C., Lauterbur, E., Ratovonjanahary, L., & Taylor, L. L. (2011). The effects of  
466 habitat disturbance on lemurs at Ranomafana National Park, Madagascar. *International Journal*  
467 *of Primatology*, 32(5), 1091–1108. <https://doi.org/10.1007/s10764-011-9525-8>
- 468 Hladik, C. M., Charles-Dominique, P., & Petter, J. J. (1980). Feeding strategies of five nocturnal prosimians  
469 in the dry forest of the west coast of Madagascar. In P. Charles-Dominique, H. M. Cooper, A.  
470 Hladik, C. M. Hladik, E. Pages, G. F. Pariente, ... A. Schilling (Eds.), *Nocturnal Malagasy primates:*  
471 *Ecology, physiology, and behavior* (pp. 41–73). New York, USA: Academic Press.
- 472 Hohenbrink, S., Zimmermann, E., & Radespiel, U. (2015). Need for speed: Sexual maturation precedes  
473 social maturation in gray mouse lemurs. *American Journal of Primatology*, 77, 1049–1059.
- 474 Hotaling, S., Foley, M. E., Lawrence, N. M., Bocanegra, J., Blanco, M. B., Rasoloarison, R. M., ... Weisrock,  
475 D. W. (2016). Species discovery and validation in a cryptic radiation of endangered primates:  
476 Coalescent-based species delimitation in Madagascar’s mouse lemurs. *Molecular Ecology*, 25(9),  
477 2029–2045. <https://doi.org/10.1111/mec.13604>
- 478 Irwin, M. T., Wright, P. C., Birkinshaw, C., Fisher, B. L., Gardner, C. J., Glos, J., ... Raharison, J.-L. (2010).  
479 Patterns of species change in anthropogenically disturbed forests of Madagascar. *Biological*  
480 *Conservation*, 143(10), 2351–2362. <https://doi.org/10.1016/j.biocon.2010.01.023>
- 481 IUCN. (2012). IUCN Red List Categories and Criteria: Version 3.1. Second edition. Gland, Switzerland and  
482 Cambridge, UK: IUCN.

- 483 IUCN. (2017, September 11). The IUCN Red List of threatened species. Retrieved September 11, 2017,  
484 from <http://www.iucnredlist.org/>
- 485 Jenkins, R. K. B., Keane, A., Rakotoarivelo, A. R., Rakotomboavonjy, V., Randrianandrianina, F. H.,  
486 Razafimanahaka, H. J., ... Jones, J. P. G. (2011). Analysis of patterns of bushmeat consumption  
487 reveals extensive exploitation of protected species in eastern Madagascar. *PLoS ONE*, *6*(12),  
488 e27570. <https://doi.org/10.1371/journal.pone.0027570>
- 489 Kappeler, P. M., & Rasoloarison, R. M. (2003). *Microcebus*, mouse lemurs, tsidy. In S. M. Goodman & J. P.  
490 Benstead (Eds.), *The natural history of Madagascar* (pp. 1310–1315). Chicago, USA: University of  
491 Chicago Press.
- 492 Karanewsky, C. J., & Wright, P. C. (2015). A preliminary investigation of sleeping site selection and  
493 sharing by the brown mouse lemur *Microcebus rufus* during the dry season. *Journal of*  
494 *Mammalogy*, *96*(6), 1344–1351. <https://doi.org/10.1093/jmammal/gyv143>
- 495 Kobbe, S., & Dausmann, K. H. (2009). Hibernation in Malagasy mouse lemurs as a strategy to counter  
496 environmental challenge. *Naturwissenschaften*, *96*(10), 1221–1227.  
497 <https://doi.org/10.1007/s00114-009-0580-3>
- 498 Lehman, S. M. (2016). Edge effects on tree dendrometrics, abiotics, and mouse lemur densities in  
499 western dry forests in Madagascar. In S. M. Lehman, U. Radespiel, & E. Zimmermann (Eds.), *The*  
500 *dwarf and mouse lemurs of Madagascar: Biology, behavior and conservation biogeography of*  
501 *the Cheirogaleidae* (pp. 462–477). Cambridge, UK: Cambridge University Press.
- 502 Lehman, S. M., Radespiel, U., & Zimmermann, E. (2016). Conservation biology of the *Cheirogaleidae*:  
503 Future research directions. In S. M. Lehman, U. Radespiel, & E. Zimmermann (Eds.), *The dwarf*  
504 *and mouse lemurs of Madagascar: Biology, behavior and conservation biogeography of the*  
505 *Cheirogaleidae* (pp. 520–540). Cambridge, UK: Cambridge University Press.

- 506 Lehman, S. M., Rajaonson, A., & Day, S. (2006a). Edge effects and their influence on lemur density and  
507 distribution in southeast Madagascar. *American Journal of Physical Anthropology*, *129*(2), 232–  
508 241. <https://doi.org/10.1002/ajpa.20241>
- 509 Lehman, S. M., Rajaonson, A., & Day, S. (2006b). Lemur responses to edge effects in the Vohibola III  
510 classified forest, Madagascar. *American Journal of Primatology*, *68*(3), 293–299.  
511 <https://doi.org/10.1002/ajp.20224>
- 512 Lehman, S. M., & Ratsimbazafy, J. H. (2001). Biological assessment of the Fandriana-Marolambo forest  
513 corridor. *Lemur News*, *6*(6), 8–9.
- 514 Lehman, S. M., & Wright, P. C. (2000). Preliminary study of the conservation status of lemur communities  
515 in the Betsakafandrika region of eastern Madagascar. *Lemur News*, *5*, 23–25.
- 516 Lei, R., McLain, A. T., Frasier, C. L., Taylor, J. M., Bailey, C. A., Engberg, S. E., ... Louis Jr., E. E. (2015). A new  
517 species in the genus *Cheirogaleus* (*Cheirogaleidae*). *Primate Conservation*, *29*(1), 43–54.  
518 <https://doi.org/10.1896/052.029.0103>
- 519 Louis Jr., E. E., & Lei, R. (2016). 3 Mitogenomics of the family *Cheirogaleidae* and relationships to  
520 taxonomy and biogeography in Madagascar. In S. M. Lehman, U. Radespiel, & E. Zimmermann  
521 (Eds.), *The dwarf and mouse lemurs of Madagascar: Biology, behavior and conservation*  
522 *biogeography of the Cheirogaleidae* (pp. 54–93). Cambridge, UK: Cambridge University Press.
- 523 Meyler, S. V., Salmona, J., Ibouroi, M. T., Besolo, A., Rasolondraibe, E., Radespiel, U., ... Chikhi, L. (2012).  
524 Density estimates of two endangered nocturnal lemur species from northern Madagascar: New  
525 results and a comparison of commonly used methods. *American Journal of Primatology*, *74*(5),  
526 414–422. <https://doi.org/10.1002/ajp.21997>
- 527 Miller, A., Salmona, J., Mills, H., Ralantoharijaona, T., Andriaholinirina Volaso, N., Misandeu, C., ...  
528 Bencini, R. (submitted). Forest type influences population densities of *Avahi laniger* and  
529 *Microcebus* spp. in Manompana, north-eastern Madagascar.

- 530 Mittermeier, R. A., Louis Jr., E. E., Langrand, O., Schwitzer, C., Gauthier, L., Rylands, A. B., ... Roos, C.  
531 (2014). *Lémuriens de Madagascar*. Muséum national d'Histoire naturelle.
- 532 Mittermeier, R. A., Louis Jr., E. E., Richardson, M., Schwitzer, C., Langrand, O., Rylands, A. B., ...  
533 Mackinnon, J. (Eds.). (2010). *Lemurs of Madagascar* (3rd ed.). Arlington, USA: Conservation  
534 International.
- 535 Moat, J., & Smith, P. P. (2007). *Atlas of the vegetation of Madagascar*. Kew, UK: Royal Botanic Gardens.
- 536 Myers, N., Mittermeier, R. A., Mittermeier, C. G., Da Fonseca, G. A., & Kent, J. (2000). Biodiversity  
537 hotspots for conservation priorities. *Nature*, *403*(6772), 853–858.
- 538 Quéméré, E., Hibert, F., Miquel, C., Lhuillier, E., Rasolondraibe, E., Champeau, J., ... Chikhi, L. (2013). A  
539 DNA metabarcoding study of a primate dietary diversity and plasticity across its entire  
540 fragmented range. *PLoS ONE*, *8*(3), e58971. <https://doi.org/10.1371/journal.pone.0058971>
- 541 R Core Team. (2015). *R: A language and environment for statistical computing*. Vienna, Austria: R  
542 Foundation for Statistical Computing. Retrieved from <https://www.R-project.org/>
- 543 Radespiel, U. (2007). Ecological diversity and seasonal adaptations of mouse lemurs (*Microcebus* spp.). In  
544 L. Gold & M. L. Sauther (Eds.), *Lemurs: ecology and adaptation* (pp. 211–234). New York, USA:  
545 Springer.
- 546 Radespiel, U. (2016). Can behavioral ecology help to understand the divergent geographic range sizes of  
547 mouse lemurs? In S. M. Lehman, U. Radespiel, & E. Zimmermann (Eds.), *The dwarf and mouse*  
548 *lemurs of Madagascar: Biology, behavior and conservation biogeography of the Cheirogaleidae*  
549 (pp. 498–519). Cambridge, UK: Cambridge University Press.
- 550 Radespiel, U., Ratsimbazafy, J. H., Rasoloharijaona, S., Raveloson, H., Andriaholinirina, N.,  
551 Rakotondravony, R., ... Randrianambinina, B. (2012). First indications of a highland specialist  
552 among mouse lemurs (*Microcebus* spp.) and evidence for a new mouse lemur species from  
553 eastern Madagascar. *Primates*, *53*(2), 157–170. <https://doi.org/10.1007/s10329-011-0290-2>

- 554 Radespiel, U., Reimann, W., Rahelinirina, M., & Zimmermann, E. (2006). Feeding ecology of sympatric  
555 mouse lemur species in northwestern Madagascar. *International Journal of Primatology*, 27(1),  
556 311–321. <https://doi.org/10.1007/s10764-005-9005-0>
- 557 Radespiel, U., Zimmermann, E., & Jurić, M. (2009). Sociogenetic structures, dispersal and the risk of  
558 inbreeding in a small nocturnal lemur, the golden–brown mouse lemur (*Microcebus*  
559 *ravelobensis*). *Behaviour*, 146(4), 607–628. <https://doi.org/10.1163/156853909X426372>
- 560 Rakotomavo, A. (2009). *Schéma d'aménagement du site KoloAla Manompana*. Manompana,  
561 Madagascar: AIM, Union Européene.
- 562 Rakotondranary, S. J., Struck, U., Knoblauch, C., & Ganzhorn, J. U. (2011). Regional, seasonal and  
563 interspecific variation in 15N and 13C in sympatric mouse lemurs. *Naturwissenschaften*, 98(11),  
564 909–917. <https://doi.org/10.1007/s00114-011-0840-x>
- 565 Randrianambinina, B., Rasoloharijaona, S., Rakotondravony, R., Zimmermann, E., & Radespiel, U. (2010).  
566 Abundance and conservation status of two newly described lemur species in northwestern  
567 Madagascar (*Microcebus danfossi*, *Lepilemur grewcockorum*). Supplementary Material.  
568 *Madagascar Conservation & Development*, 5(2), 95–102.
- 569 Rasoazanabary, E. (2004). A preliminary study of mouse lemurs in the Beza Mahafaly Special Reserve,  
570 southwest Madagascar. *Lemur News*, 9, 4–7.
- 571 Rasoloarison, R. M., Weisrock, D. W., Yoder, A. D., Rakotondravony, D., & Kappeler, P. M. (2013). Two  
572 new species of mouse lemurs (*Cheirogaleidae: Microcebus*) from eastern Madagascar.  
573 *International Journal of Primatology*, 34(3), 455–469. [https://doi.org/10.1007/s10764-013-9672-](https://doi.org/10.1007/s10764-013-9672-1)  
574 1
- 575 Ratsirarson, J., & Ranaivonasy, J. (2002). Ecologie des lémuriens dans la forêt littorale de Tampolo. *Lemur*  
576 *News*, 7, 26–30.
- 577 Salmona, J., Banks, M., Ralantoharijaona, T. N., Rasolondraibe, E., Zaranaina, R., Rakotonanahary, A., ...  
578 Chikhi, L. (2015). The value of the spineless monkey orange tree (*Strychnos madagascariensis*)

- 579 for conservation of northern sportive lemurs (*Lepilemur milanoii* and *L. ankaranensis*).
- 580 *Madagascar Conservation & Development*, 10(2), 53–59.
- 581 Schäffler, L., Saborowski, J., & Kappeler, P. M. (2015). Agent-mediated spatial storage effect in
- 582 heterogeneous habitat stabilizes competitive mouse lemur coexistence in Menabe Central,
- 583 western Madagascar. *BMC Ecology*, 15(1). <https://doi.org/10.1186/s12898-015-0040-1>
- 584 Schmid, J. (1998). Tree holes used for resting by gray mouse lemurs (*Microcebus murinus*) in
- 585 Madagascar: Insulation capacities and energetic consequences. *International Journal of*
- 586 *Primateology*, 19(5), 797–809.
- 587 Schwitzer, C., Chikhi, L., Donati, G., Irwin, M. T., Johnson, S. E., Mittermeier, R. A., ... Ratsimbazafy, J. H.
- 588 (2014). Protecting lemurs: Ecotourism. *Science*, 344(6182), 358–359.
- 589 Schwitzer, C., Mittermeier, R. A., Davies, N., Johnson, S., Ratsimbazafy, J. H., Razafindramanana, J., ...
- 590 Rajaobelina, S. (2013). *Lemurs of Madagascar: A strategy for their conservation 2013-2016*.
- 591 Bristol, UK: IUCN SSC Primate Specialist Group, Bristol Conservation and Science Foundation, and
- 592 Conservation International.
- 593 Schwitzer, C., Mittermeier, R. A., Johnson, S. E., Donati, G., Irwin, M. T., Peacock, H., ... Wright, P. C.
- 594 (2014). Averting lemur extinctions amid Madagascar's political crisis. *Science*, 343, 842–843.
- 595 Sehen, L., Goetze, D., Rajeriarison, C., Roger, E., Thorén, S., & Radespiel, U. (2010). Structural and floristic
- 596 traits of habitats with differing relative abundance of the lemurs *Microcebus murinus* and *M.*
- 597 *ravelobensis* in northwestern Madagascar. *Ecotropica*, 16(1), 15–30.
- 598 Setash, C. M., Zohdy, S., Gerber, B. D., & Karanewsky, C. J. (2017). A biogeographical perspective on the
- 599 variation in mouse lemur density throughout Madagascar. *Mammal Review*, 47(3), 212–229.
- 600 <https://doi.org/10.1111/mam.12093>
- 601 Thiele, D., Razafimahatratra, E., & Hapke, A. (2013). Discrepant partitioning of genetic diversity in mouse
- 602 lemurs and dwarf lemurs— biological reality or taxonomic bias? *Molecular Phylogenetics and*
- 603 *Evolution*, 69(3), 593–609.

- 604 Thorén, S., Quietzsch, F., Schwochow, D., Sehen, L., Meusel, C., Meares, K., & Radespiel, U. (2011).  
605 Seasonal changes in feeding ecology and activity patterns of two sympatric mouse lemur species,  
606 the gray mouse lemur (*Microcebus murinus*) and the golden-brown mouse lemur (*M.*  
607 *ravelobensis*), in northwestern Madagascar. *International Journal of Primatology*, 32(3), 566–  
608 586. <https://doi.org/10.1007/s10764-010-9488-1>
- 609 Wright, P. C., Razafindratsita, V. R., Pochron, S. T., & Jernvall, J. (2005). The key to Madagascar  
610 frugivores. In J. L. Dew & J. P. Boubli (Eds.), *Tropical fruits and frugivores: The search for strong*  
611 *interactors* (pp. 121–138). New York, USA: Springer.
- 612 Yoder, A. D., Campbell, C. R., Blanco, M. B., dos Reis, M., Ganzhorn, J. U., Goodman, S. M., ... Weisrock, D.  
613 W. (2016). Geogenetic patterns in mouse lemurs (genus *Microcebus* ) reveal the ghosts of  
614 Madagascar's forests past. *Proceedings of the National Academy of Sciences*, 113(29), 8049–  
615 8056. <https://doi.org/10.1073/pnas.1601081113>
- 616 Zimmermann, E., & Radespiel, U. (2013). Primate life histories. In W. Henke & I. Tattersall (Eds.),  
617 *Handbook of Paleoanthropology* (pp. 1–58). Berlin Heidelberg, Germany: Springer.
- 618

**Table 2: Overview on reviewed studies**

| Source                                                         | Species     | Species*   | IUCN | Range | Site                         | Forest type | Degradation | Response to DF |
|----------------------------------------------------------------|-------------|------------|------|-------|------------------------------|-------------|-------------|----------------|
| Andriamandimbiarisoa et al. 2015                               | <i>gan</i>  | <i>mur</i> | ns   | ns    | Tolagnaro                    | H           | I, II       | 0              |
| Atsalis 1999                                                   | <i>ruf</i>  |            | VU   | M     | Ranomafana                   | H           | II          | +              |
| Blow et al. 2014                                               | <i>ruf</i>  |            | VU   | M     | Tampolo                      | H           | ns          | -              |
| Bohr et al. 2011                                               | <i>gris</i> |            | LC   | L     | Tsimanampetsotsa             | D           | ns          | -              |
| Burke & Lehman 2014                                            | <i>mur</i>  |            | LC   | L     | Ankarafantsika               | D           | I           | -              |
| Burke & Lehman 2014                                            | <i>rav</i>  |            | EN   | M     | Ankarafantsika               | D           | I           | +              |
| Corbin & Schmid 1995                                           | <i>mur</i>  |            | LC   | L     | Morondava                    | D           | II          | +              |
| Dammhahn & Kappeler 2008a, b, 2009, 2010                       | <i>ber</i>  |            | EN   | S     | Morondava                    | D           | ns          | -              |
| Dammhahn & Kappeler 2008a, b, 2009, 2010, Dammhahn et al. 2009 | <i>mur</i>  |            | LC   | L     | Morondava                    | D           | ns          | 0              |
| Deppe et al. 2007                                              | <i>spp</i>  |            | ns   | ns    | Ranomafana                   | H           | I, II, c    | 0              |
| Evans et al. 1995                                              | <i>ruf</i>  |            | VU   | M     | Ambatovaky                   | H           | I, II       | 0              |
| Ganzhorn & Schmid 1998                                         | <i>mur</i>  |            | LC   | L     | Morondava                    | D           | I, II       | -              |
| Ganzhorn 1987                                                  | <i>leh</i>  | <i>ruf</i> | VU   | M     | Andasibe- Mantadia           | H           | I, c        | -              |
| Ganzhorn 1988                                                  | <i>leh</i>  | <i>ruf</i> | VU   | M     | Andasibe- Mantadia           | H           | ns          | +              |
| Ganzhorn 1988                                                  | <i>mur</i>  |            | LC   | L     | Ankarafantsika               | D           | ns          | ns             |
| Ganzhorn 1989                                                  | <i>leh</i>  | <i>ruf</i> | VU   | M     | Andasibe- Mantadia           | H           | ns          | ns             |
| Ganzhorn 1995                                                  | <i>myox</i> |            | VU   | L     | Morondava                    | D           | I, II       | +              |
| Ganzhorn 1995                                                  | <i>mur</i>  |            | LC   | L     | Morondava                    | D           | I, II       | +              |
| Ganzhorn 2003                                                  | <i>mur</i>  |            | LC   | L     | Morondava                    | D           | I, II, c, g | -              |
| Ganzhorn et al. 1997                                           | <i>arn</i>  | <i>ruf</i> | EN   | S     | Montagne d'Ambre             | H           | I, II       | 0              |
| Ganzhorn et al. 2003                                           | <i>ruf</i>  |            | VU   | M     | ns                           | H           | II          | 0              |
| Ganzhorn et al. 2007                                           | <i>gan</i>  | <i>spp</i> | ns   | ns    | Tolagnaro                    | H           | II, c       | 0              |
| Gardner & Davies 2014                                          | <i>gris</i> |            | LC   | L     | Ranobe                       | D           | II, p       | -              |
| Gardner & Davies 2014                                          | <i>mur</i>  |            | LC   | L     | Ranobe                       | D           | II, p       | ns             |
| Génin 2008                                                     | <i>gris</i> |            | LC   | L     | Tolagnaro                    | D           | ns          | ns             |
| Golden 2009; Golden et al. 2014,                               |             |            |      |       |                              |             |             |                |
| Golden & Comaroff 2015                                         | <i>spp</i>  |            | ns   | ns    | Makira                       | H           | ns          | -              |
| Goodman 2003                                                   | <i>ber</i>  |            | EN   | S     | Morondava                    | D           | ns          | ns             |
| Goodman 2003                                                   | <i>gris</i> |            | LC   | L     | ns                           | D           | ns          | ns             |
| Goodman 2003                                                   | <i>ruf</i>  |            | VU   | M     | ns                           | H           | ns          | ns             |
| Herrera et al. 2011                                            | <i>ruf</i>  |            | VU   | M     | Ranomafana                   | H           | I, II       | +              |
| Hladik et al. 1980                                             | <i>mur</i>  |            | LC   | L     | Morondava                    | D           | ns          | 0              |
| Jenkins et al. 2011                                            | <i>spp</i>  |            | ns   | ns    | Moramanga-<br>Anosibe An'ala | H           | I, p        | -              |
| Kobbe & Dausmann 2009                                          | <i>gris</i> |            | LC   | L     | Tsimanampetsotsa             | D           | ns          | ns             |
| Lahann 2006                                                    | <i>ruf</i>  |            | VU   | M     | ns                           | H           | ns          | ns             |
| Lahann 2007                                                    | <i>gan</i>  | <i>mur</i> | ns   | ns    | Tolagnaro                    | H           | I, II       | ns             |
| Lahann 2008                                                    | <i>gan</i>  | <i>mur</i> | ns   | ns    | Tolagnaro                    | H           | II          | ns             |
| Lehman & Ratsimbazafy 2001                                     | <i>ruf</i>  |            | VU   | M     | Marolambo                    | H           | ns          | -              |
| Lehman 2006, Lehman et al. 2006a, b, Rajaonson et al. 2010     | <i>ruf</i>  |            | VU   | M     | Ranomafana                   | H           | ns          | -              |
| Malone et al. 2013                                             | <i>mur</i>  |            | LC   | L     | Tolagnaro                    | H           | II, c       | 0              |
| Meyler et al. 2012                                             | <i>tav</i>  |            | VU   | S     | Daraina                      | D           | I, II       | +              |
| Miller et al. in prep.                                         | <i>spp</i>  |            | ns   | ns    | Manompana                    | H           | I, II       | +              |
| Mittermeier et al. 2010                                        | <i>sam</i>  |            | EN   | S     | ns                           | H           | ns          | 0              |
| Murphy et al. 2016                                             | <i>spp</i>  |            | ns   | ns    | Makira                       | H           | I, II       | 0              |

(continued)



|                                                                    |                       |    |    |                    |   |           |    |
|--------------------------------------------------------------------|-----------------------|----|----|--------------------|---|-----------|----|
| Nash 2000                                                          | <i>mur</i>            | LC | L  | Beza Mahafaly      | D | II, ns    | +  |
| Nguyen et al. 2013                                                 | <i>spp</i>            | ns | ns | Tolagnaro          | H | II, c     | 0  |
| Radespiel & Raveloson 2001                                         | <i>mur</i>            | LC | L  | Ankarafantsika     | D | I, II     | 0  |
| Radespiel & Raveloson 2001                                         | <i>rav</i>            | EN | M  | Ankarafantsika     | D | I, II     | 0  |
| Radespiel et al. 2012                                              | <i>ger</i>            | CR | S  | Andasibe- Mantadia | H | c, ns     | 0  |
| Radespiel et al. 2012                                              | <i>leh</i>            | VU | M  | Andasibe- Mantadia | H | c, ns     | 0  |
| Raharivololona 2009, Raharivolona & Ganzhorn 2009                  | <i>gan</i> <i>mur</i> | ns | ns | Tolagnaro          | H | ns        | -  |
| Rakotoarivony 2007                                                 | <i>mur</i>            | LC | L  | Ankarafantsika     | D | II, ns    | 0  |
| Rakotoarivony 2007                                                 | <i>rav</i>            | EN | M  | Ankarafantsika     | D | II, ns    | 0  |
| Rakotondravony & Radespiel 2009                                    | <i>mur</i>            | LC | L  | Ankarafantsika     | D | ns        | -  |
| Rakotondravony & Radespiel 2009                                    | <i>rav</i>            | EN | M  | Ankarafantsika     | D | ns        | ns |
| Ralison 2007                                                       | <i>spp</i>            | ns | ns | Andranomanitsy     | D | II        | +  |
| Ramanamanjato & Ganzhorn 2001                                      | <i>gan</i> <i>mur</i> | ns | ns | Tolagnaro          | H | I, II, c  | -  |
| Ramarokoto 2003                                                    | <i>gan</i> <i>mur</i> | ns | ns | Tolagnaro          | H | II        | 0  |
| Randrianamanantsaina 2010                                          | <i>ruf</i>            | VU | M  | Ranomafana         | H | II        | -  |
| Randrianambinina et al. 2003                                       | <i>spp</i>            | ns | ns | Antsohihy          | H | II, c     | +  |
| Randrianambinina et al. 2010                                       | <i>dan</i>            | EN | M  | Antsohihy          | D | I, II     | +  |
| Randrianarisoa et al. 2001                                         | <i>mur</i>            | LC | L  | Kasijy             | D | ns        | 0  |
| Randriatahina et al. 2014                                          | <i>sam</i>            | EN | S  | S.-Îles Radama     | H | II, ns    | +  |
| Rasambainarivo et al. 2013, Bublitz et al. 2014, Zohdy et al. 2015 | <i>ruf</i>            | VU | M  | Ranomafana         | H | I, II, ns | -  |
| Rasoazanabary 2004                                                 | <i>mur</i>            | LC | L  | Beza Mahafaly      | D | I, II     | -  |
| Rasoazanabary 2004                                                 | <i>gris</i>           | LC | L  | Beza Mahafaly      | D | I, II     | ns |
| Rasolofoson et al. 2007, Rakotondratsimba et al. 2008              | <i>mit</i>            | EN | S  | Makira             | H | I, II     | -  |
| Rasolofoson et al. 2007, Rakotondratsimba et al. 2008              | <i>spp</i>            | ns | ns | Makira             | H | I, II     | -  |
| Ratsirarson & Ranaivonasy 2002                                     | <i>ruf</i>            | VU | M  | Tampolo            | H | II        | -  |
| Ravoahangy et al. 2008                                             | <i>ruf</i>            | VU | M  | Anjombalava        | H | c, ns     | -  |
| Ravoahangy et al. 2008                                             | <i>gris</i>           | LC | L  | Adabolava          | D | II, ns    | +  |
| Rendigs et al. 2003, Radespiel et al. 2006                         | <i>mur</i>            | LC | L  | Ankarafantsika     | D | II, ns    | ns |
| Rendigs et al. 2003, Radespiel et al. 2006                         | <i>rav</i>            | EN | M  | Ankarafantsika     | D | II, ns    | ns |
| Rodriguez et al. 2015                                              | <i>gris</i>           | LC | L  | Beza Mahafaly      | D | I, II     | ns |
| Schäffler 2011, Schäffler et al. 2015                              | <i>mur</i>            | LC | L  | Morondava          | D | I, II     | 0  |
| Schäffler 2011, Schäffler & Kappeler 2014, Schäffler et al. 2015   | <i>ber</i>            | EN | S  | Morondava          | D | I, II     | -  |
| Schmid 1998                                                        | <i>mur</i>            | LC | L  | Morondava          | D | I         | -  |
| Schwab & Ganzhorn 2004                                             | <i>mur</i>            | LC | L  | Morondava          | D | I, II, c  | 0  |
| Schwab & Ganzhorn 2004                                             | <i>ber</i>            | EN | S  | Morondava          | D | I, II, c  | -  |
| Sehen et al. 2010                                                  | <i>rav</i>            | EN | M  | Ankarafantsika     | D | II, ns    | 0  |
| Sehen et al. 2010                                                  | <i>mur</i>            | LC | L  | Ankarafantsika     | D | II, ns    | ns |
| Smith et al. 1997                                                  | <i>mur</i>            | LC | L  | Morondava          | D | I, II, g  | -  |
| Thorén et al. 2011                                                 | <i>mur</i>            | LC | L  | Ankarafantsika     | D | ns        | ns |
| Thorén et al. 2011                                                 | <i>rav</i>            | EN | M  | Ankarafantsika     | D | ns        | ns |
| Wright et al. 2005, Karanewsky and Wright 2015                     | <i>ruf</i>            | VU | M  | Ranomafana         | H | I, II     | -  |

**Key to table:** ns= not specified, s.a.a.= same as above. **Species=** species name according to current taxonomy. *ber*= *M. berthae*, *dan*= *M. danfossi*, *gan*= *M. ganzhorni*, *ger*= *M. gerpi*, *gris*= *M. griseorufus*, *leh*= *M. lehilahytsara*, *mit*= *M. mittermeieri*, *mur*= *M. murinus*, *myox*= *M. myoxinus*, *rav*= *M. ravelobensis*, *ruf*= *M. rufus*, *sam*= *M. sambiranensis*. **Species\*=** Species name as mentioned in publication, if divergent from species name according to current taxonomy. **IUCN:** LC= Least Concern, VU= Vulnerable, EN= Endangered, CR= Critically Endangered. **Range:** S= small range size, M= medium range size, L= large range size. **Site:** v= various. **Forest type:** D= dry forest, H= humid forest, DH= dry and humid forest. **Degradation:** I= primary forest, II= secondary forest, c= cultivated area, g= grassland.

**Goals:** BG= Biogeography, Com= Competition, Con= Conservation, De= Density, Dis= Distribution, E= Ecology, GI= General Information, HF= Habitat flexibility, HS= Habitat structure, Hib= Hibernation, HumI= Human Influence, M= Methodology, Po= Poaching, Pr= Predation, Se= Seasonality, So= Sociality, Su= General survey, Pa= Pathogens and Parasites, R= Reproduction, SS= Sleeping sites, T= Taxonomy.
